# Supplementary figures and images for: Olive Mill Wastewater Inhibits Growth and Proliferation of Cisplatin- and Gemcitabine-Resistant Bladder Cancer Cells In Vitro by Down-Regulating the Akt/mTOR-Signaling Pathway
Source: MDPI journal article supplement (doi:10.3390/nu14020369), 2022-01-15

Supplement Figure S1 Western Blot, Figure 6A

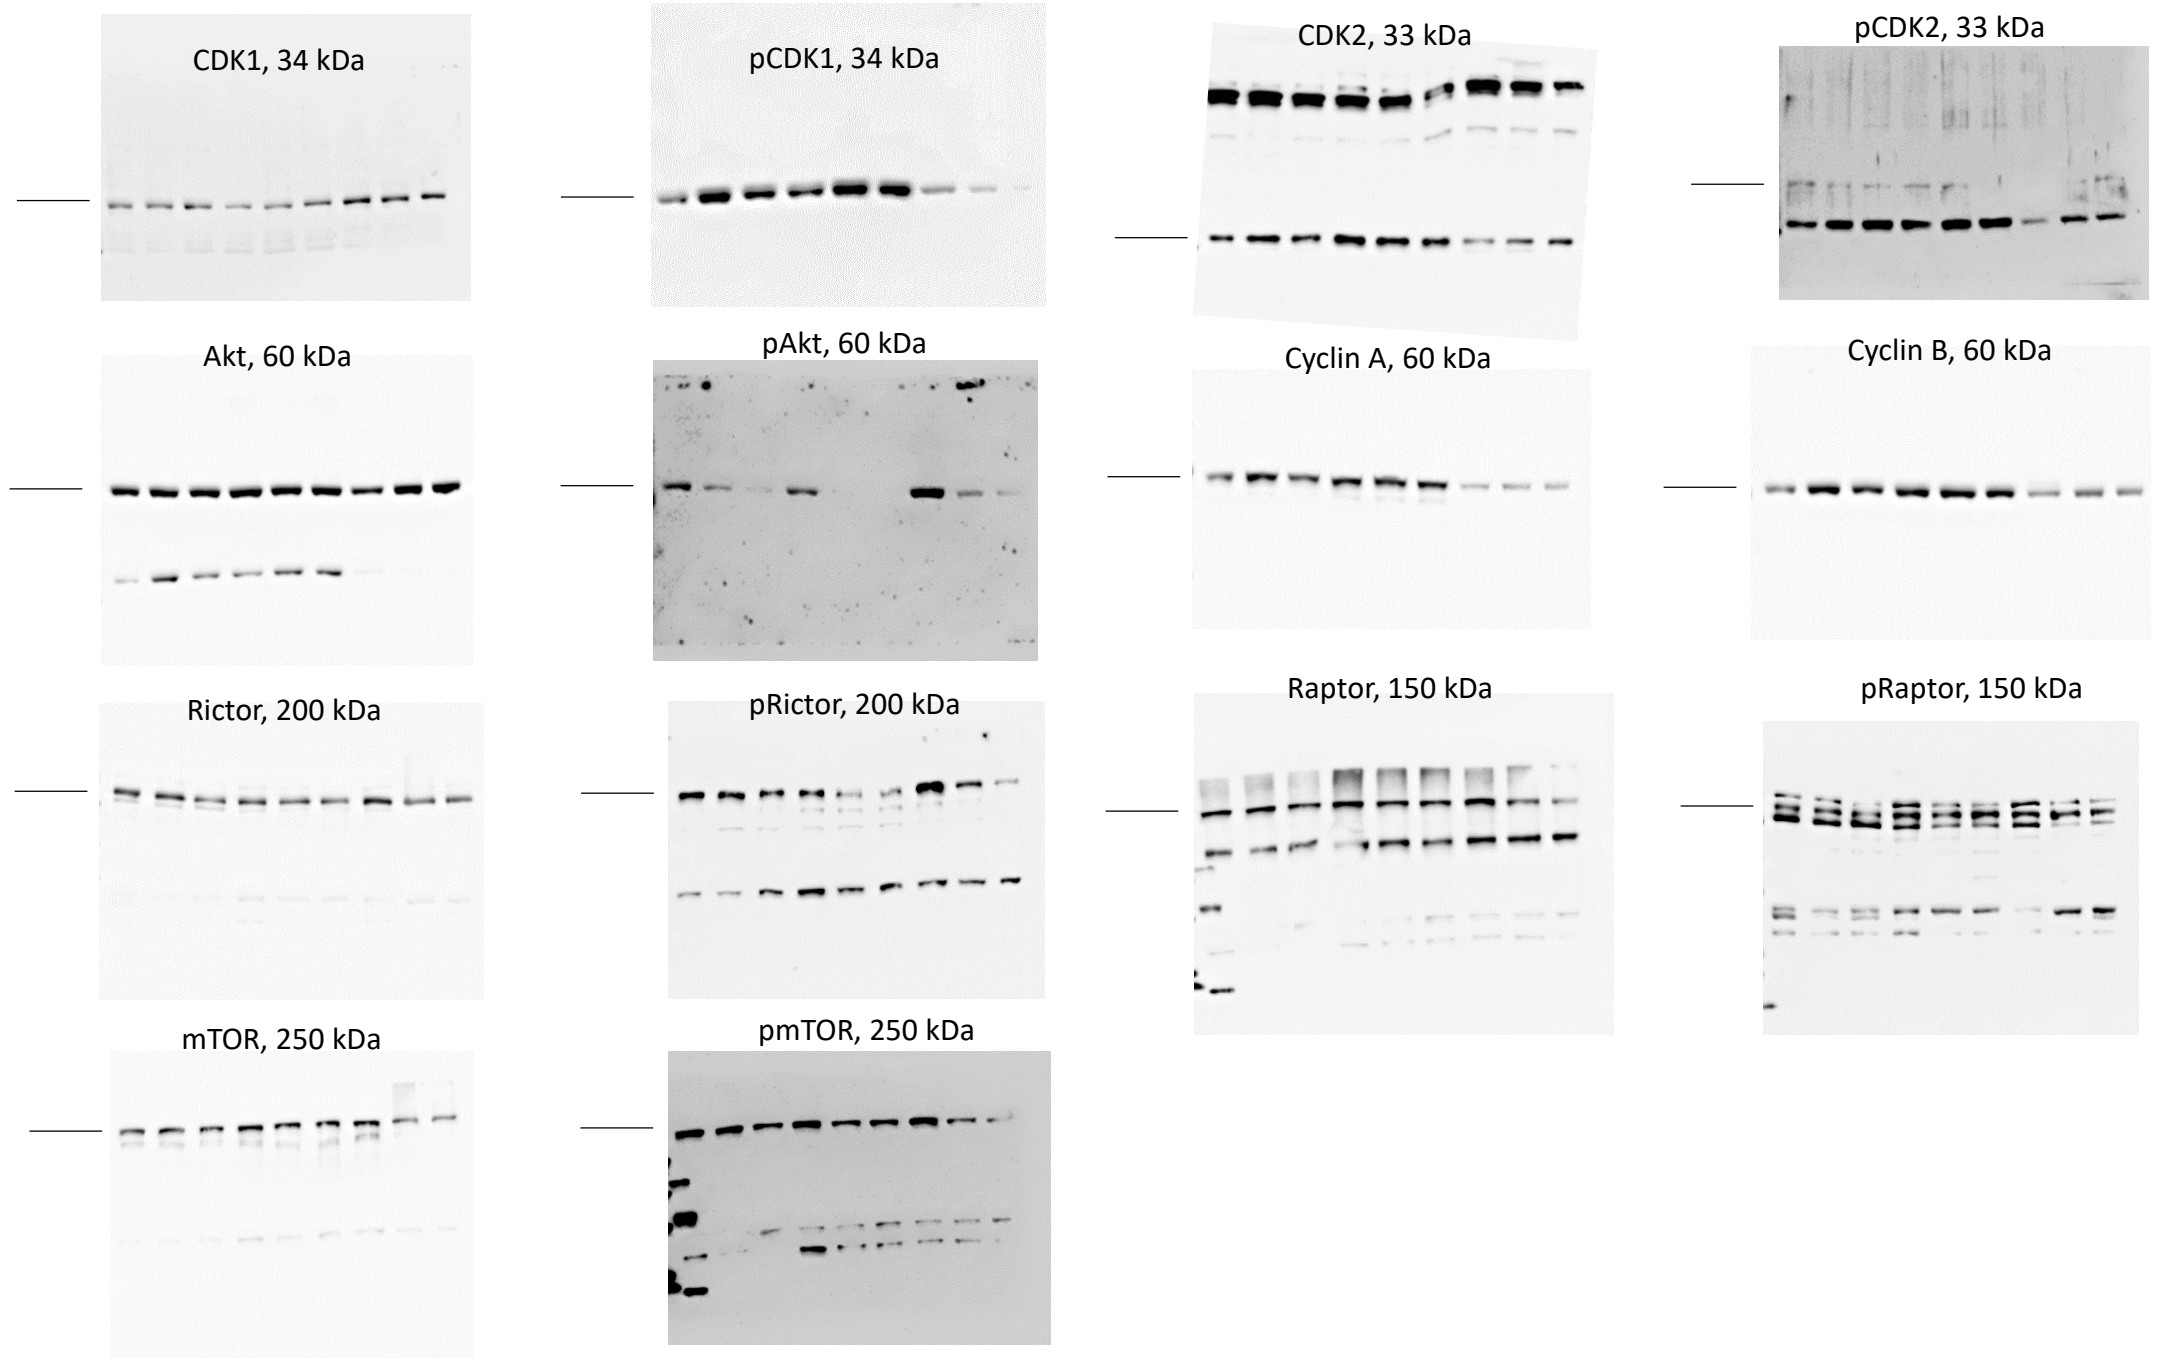

Western Blot, Figure 7A

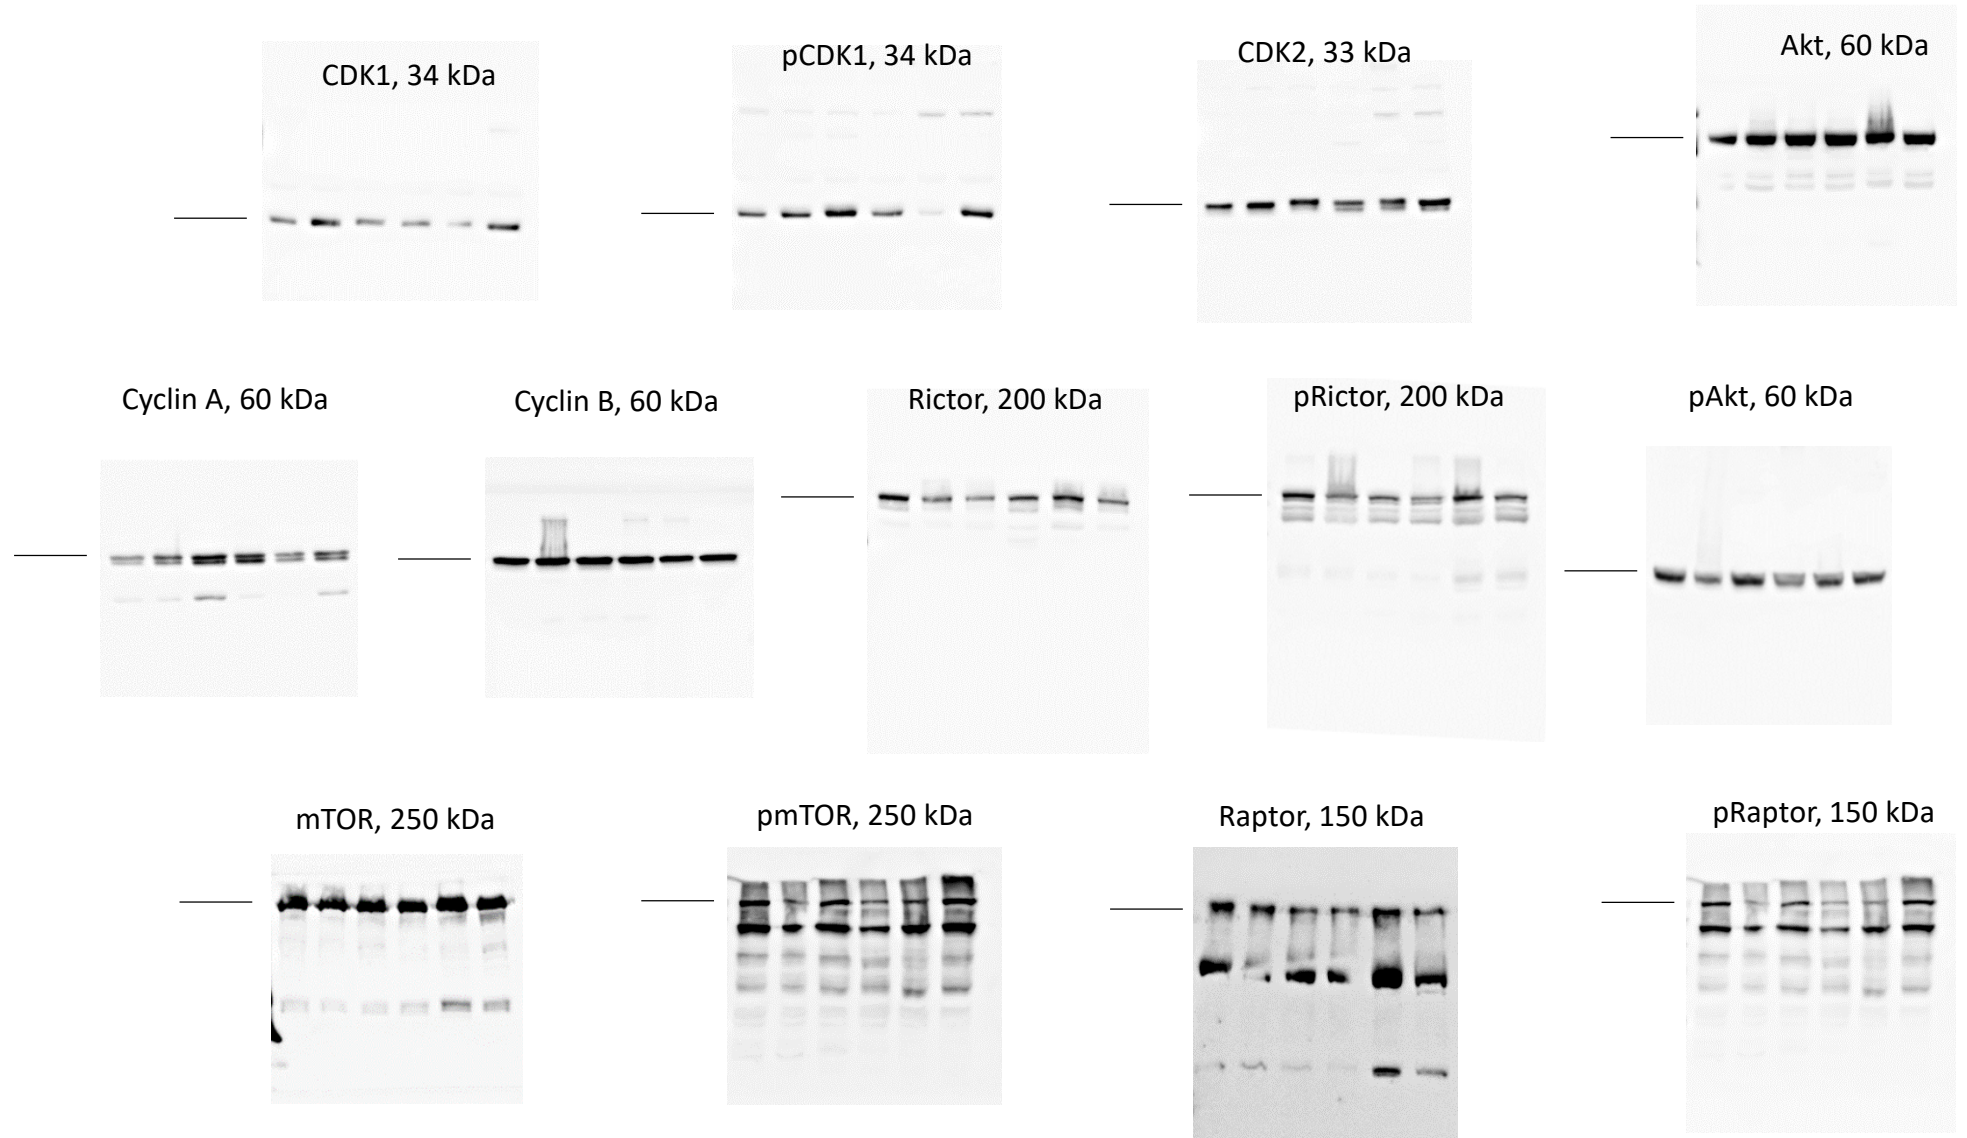

Supplement: s1 [file s1]
